# Supplementary material
Source: HighWire-hosted journal article supplement (http://www.cmaj.ca/highwire/filestream/58323/field_highwire_adjunct_files/0/use-birnie-online_appendix_1.pdf)
Supplement: use-birnie-online_appendix_1.pdf [file use-birnie-online_appendix_1.pdf]

**Appendix 1: International Classification of Diseases (ICD, ninth and tenth revision) codes used to define the study population\***

| Event                    | ICD-9,<br>ICD-9-CCP | ICD-9-CM                                                                                                                                                       | ICD-10-CA,<br>ICD-10-CA-CCI                                                                  |
|--------------------------|---------------------|----------------------------------------------------------------------------------------------------------------------------------------------------------------|----------------------------------------------------------------------------------------------|
| Ventricular fibrillation | 427.4               | 427.41                                                                                                                                                         | I49.0, I49.00                                                                                |
| Ventricular flutter      | 427.4               | 427.42                                                                                                                                                         | I49.01                                                                                       |
| Cardiac arrest           | 427.5               | 427.5                                                                                                                                                          | I46.0, I46.1, I46.9                                                                          |
| Myocardial infarction    | 410                 | 410.00, 410.01, 410.10, 410.11, 410.20, 410.21, 410.30, 410.31, 410.40, 410.41, 410.50, 410.51, 410.60, 410.61, 410.70, 410.71, 410.80, 410.81, 410.90, 410.91 | I21.0, I21.1, I21.2, I21.3, I21.4, I21.41, I21.42, I21.49, I21.9, I22.0, I22.1, I22.8, I22.0 |
| Defibrillator            | 37.94               | 49.74                                                                                                                                                          | 1.HZ.53.GR-FS                                                                                |

Note: CCP = Canadian Classification of Procedures, CM = clinical modification, CA = Canadian enhancement, CCI = Canadian Classification of Health Interventions.

\*Because some Canadian provinces and territories lacked the capacity for implantation of implantable cardioverter defibrillators during some part of the 9-year study period, we excluded data from Newfoundland and Labrador, New Brunswick, Prince Edward Island and all of the territories.
